# Supplementary material for: Pre-Degassed Microfluidic Chamber-Based Digital PCR Device for Meat Authentication Applications
Source: MDPI journal article supplement (doi:10.3390/mi12060694), 2021-06-14
Supplement: s1 [file s1]

## Supplementary materials

# Pre-Degassed Microfluidic Chamber-Based Digital PCR Device for Meat Authentication Applications

Hezhi Hu <sup>1,2,†</sup>, Jingmeng Cheng <sup>3,†</sup>, Chunyang Wei <sup>3</sup>, Shanshan Li <sup>1,3,4,\*</sup>, Chengzhuang Yu <sup>3</sup>, Xiaoshuai Meng <sup>3</sup> and Junwei Li <sup>2,5,\*</sup>

<sup>1</sup> State Key Laboratory of Reliability and Intelligence of Electrical Equipment, Hebei University of Technology, Tianjin 300132, China; huhezhi@hebut.edu.cn

<sup>2</sup> Department of Electronic and Information Engineering, Hebei University of Technology, Langfang 065000, China

<sup>3</sup> Hebei Key Laboratory of Smart Sensing and Human-robot Interactions, School of Mechanical Engineering, Tianjin 300130, China; cjm@hebut.edu.cn (J.C.); 201811201008@stu.hebut.edu.cn (C.W.); 201811201004@stu.hebut.edu.cn (C.Y.); 202021202027@stu.hebut.edu.cn (X.M.)

<sup>4</sup> Jiangsu Key Laboratory of Advanced Food Manufacturing Equipment and Technology, Wuxi 214122, China

<sup>5</sup> Institute of Biophysics, School of Science, Hebei University of Technology, Tianjin 300401, China

\* Correspondence: sli\_mems@hebut.edu.cn (S.L.); junwei\_li@hebut.edu.cn (J.L.); Tel.: +86-22-60202605 (S.L.); Tel.: +86-22-60201070 (J.L.)

† These authors contribute equally.

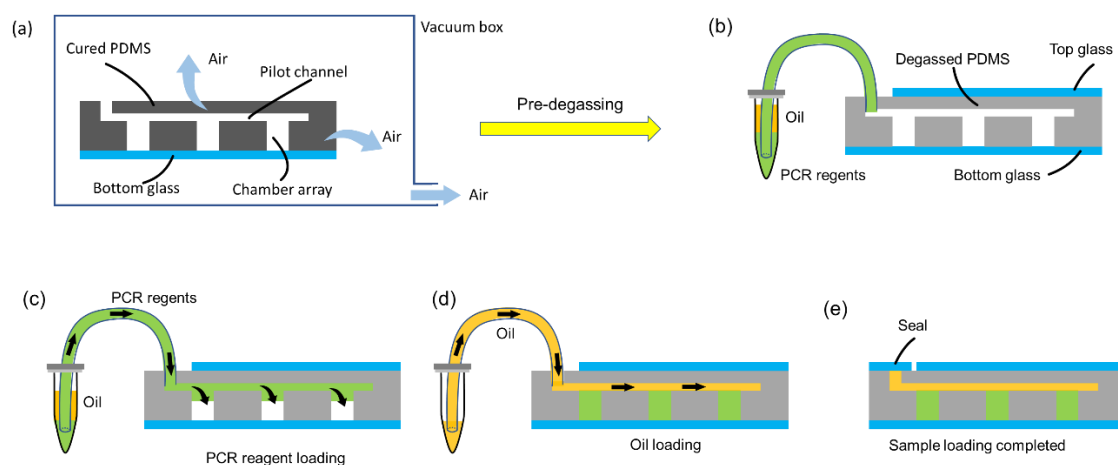

**Figure S1.** Schematic of the sample loading process with a cross-section view. (a) The pre-degassing in a vacuum box. (b) Pre-degassed dPCR chip. (c) PCR reagent loading. (d) Oil loading. (e) Sample loading completed.

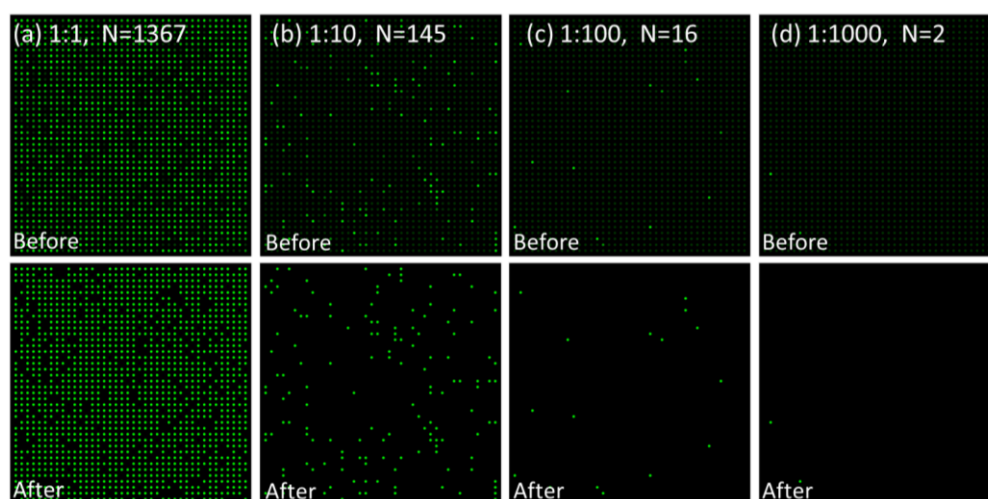

**Figure S2.** Experimental results of meat authentication applications with the fluorescence images before and after image process to read out the total numbers of positive chamber. From (a) to (d), the experimental meat samples are with chicken/mutton mass ratio of 1:1, 1:10, 1:100, and 1:1000, respectively.
